# Supplementary material for: Determination of the chemical equator from GEOS-Chem model simulation: a focus on the Tropical Western Pacific region
Source: Copernicus journal article supplement (doi:10.5194/acp-2022-653), 2022-10-11
Supplement: Supplementary file 1 [file acp-2022-653-supplement.pdf]

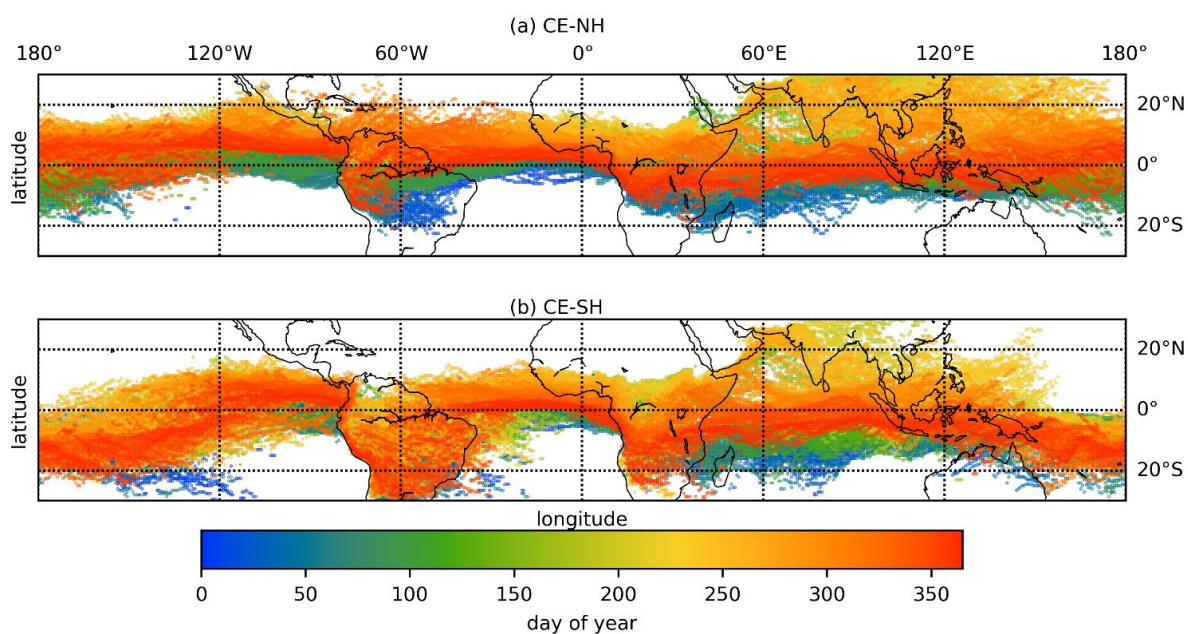

**Supplement Figure 1.** Daily CE-NH and CE-SH calculated from model simulations of (a) E1 (tracer released in NH) and (b) E2 (tracer released in SH) in 2016; the color shows the day of the year.

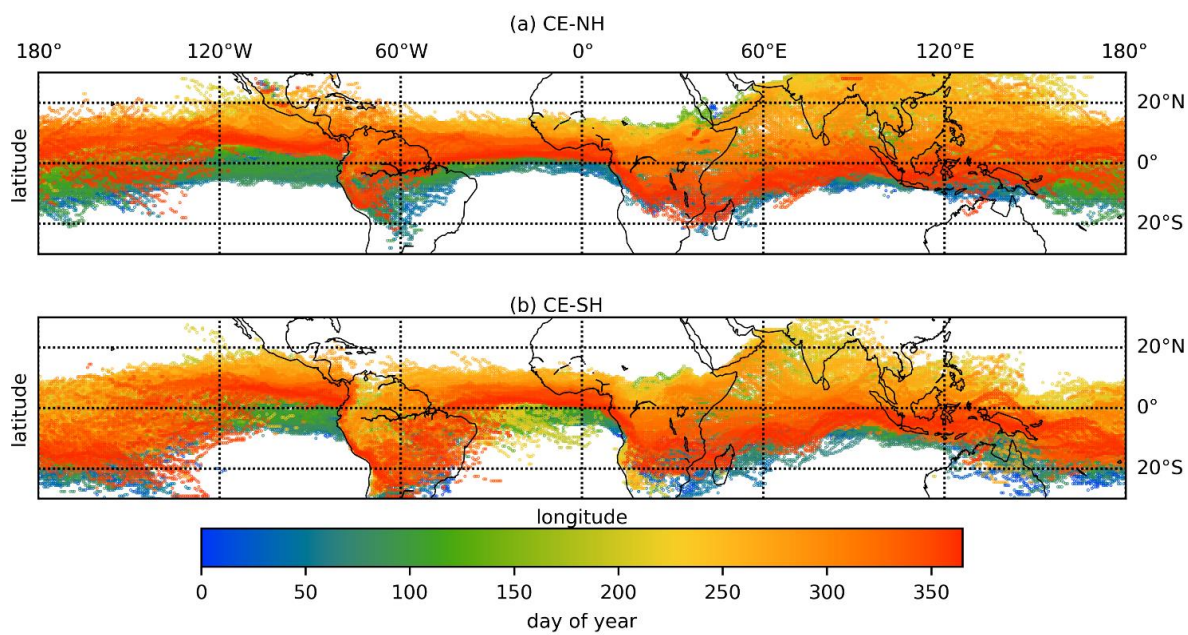

**Supplement Figure 2.** Daily CE-NH and CE-SH calculated from model simulations of (a) E1 (tracer released in NH) and (b) E2 (tracer released in SH) in 2017; the color shows the day of the year.

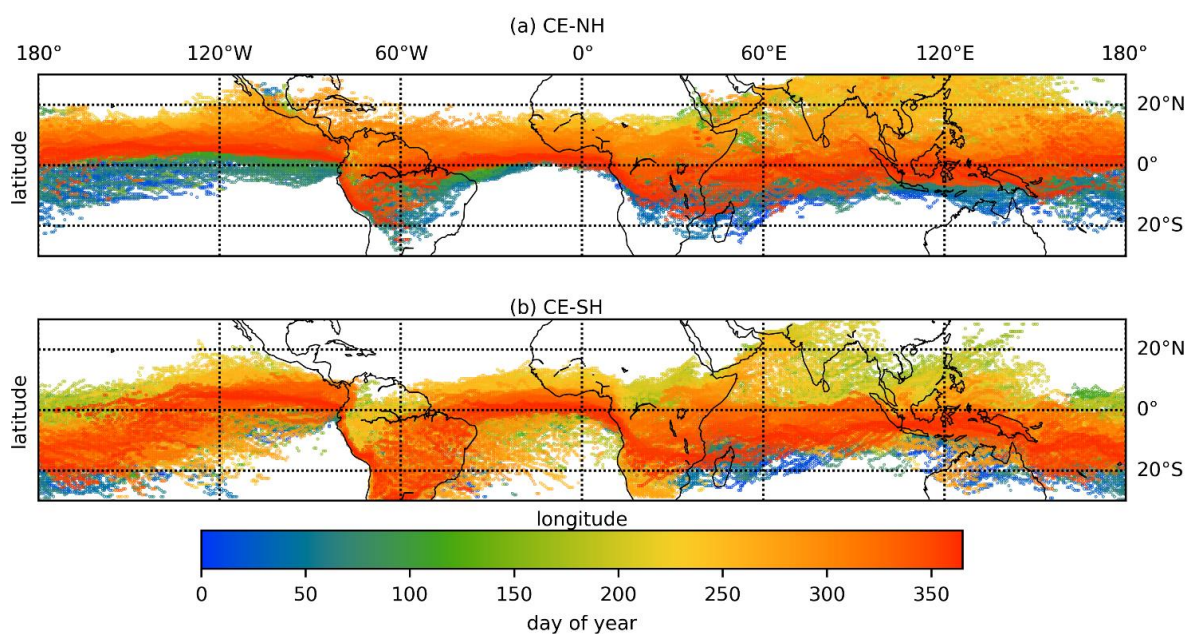

**Supplement Figure 3.** Daily CE-NH and CE-SH calculated from model simulations of (a) E1 (tracer released in NH) and (b) E2 (tracer released in SH) in 2018; the color shows the day of the year.

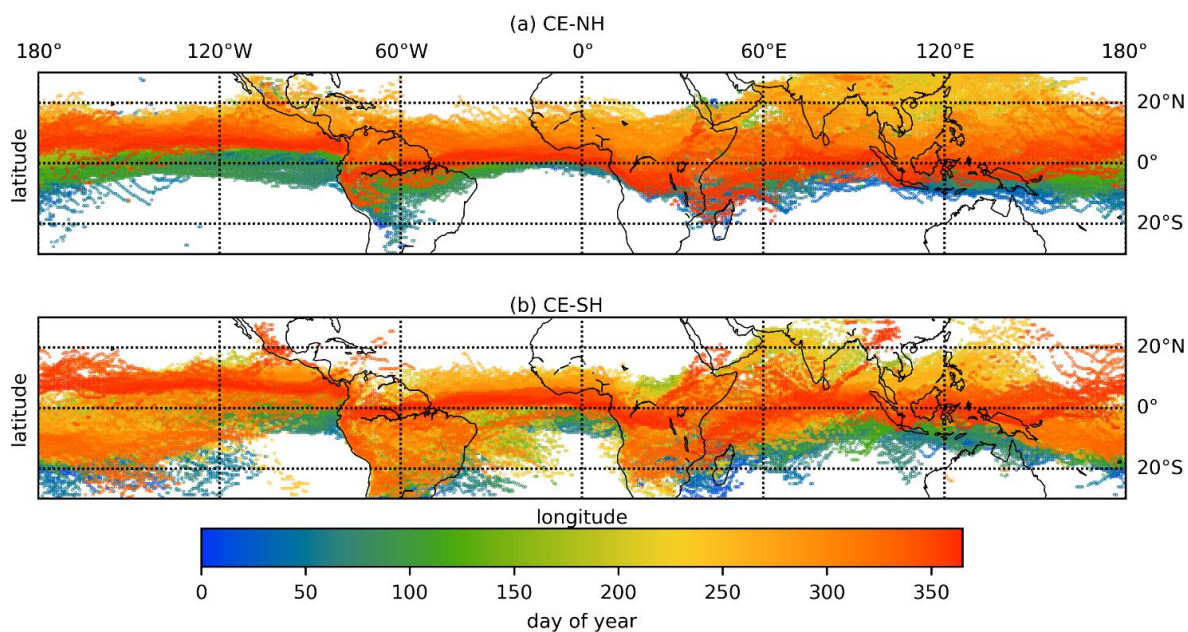

**Supplement Figure 4.** Daily CE-NH and CE-SH calculated from model simulations of (a) E1 (tracer released in NH) and (b) E2 (tracer released in SH) in 2019; the color shows the day of the year.

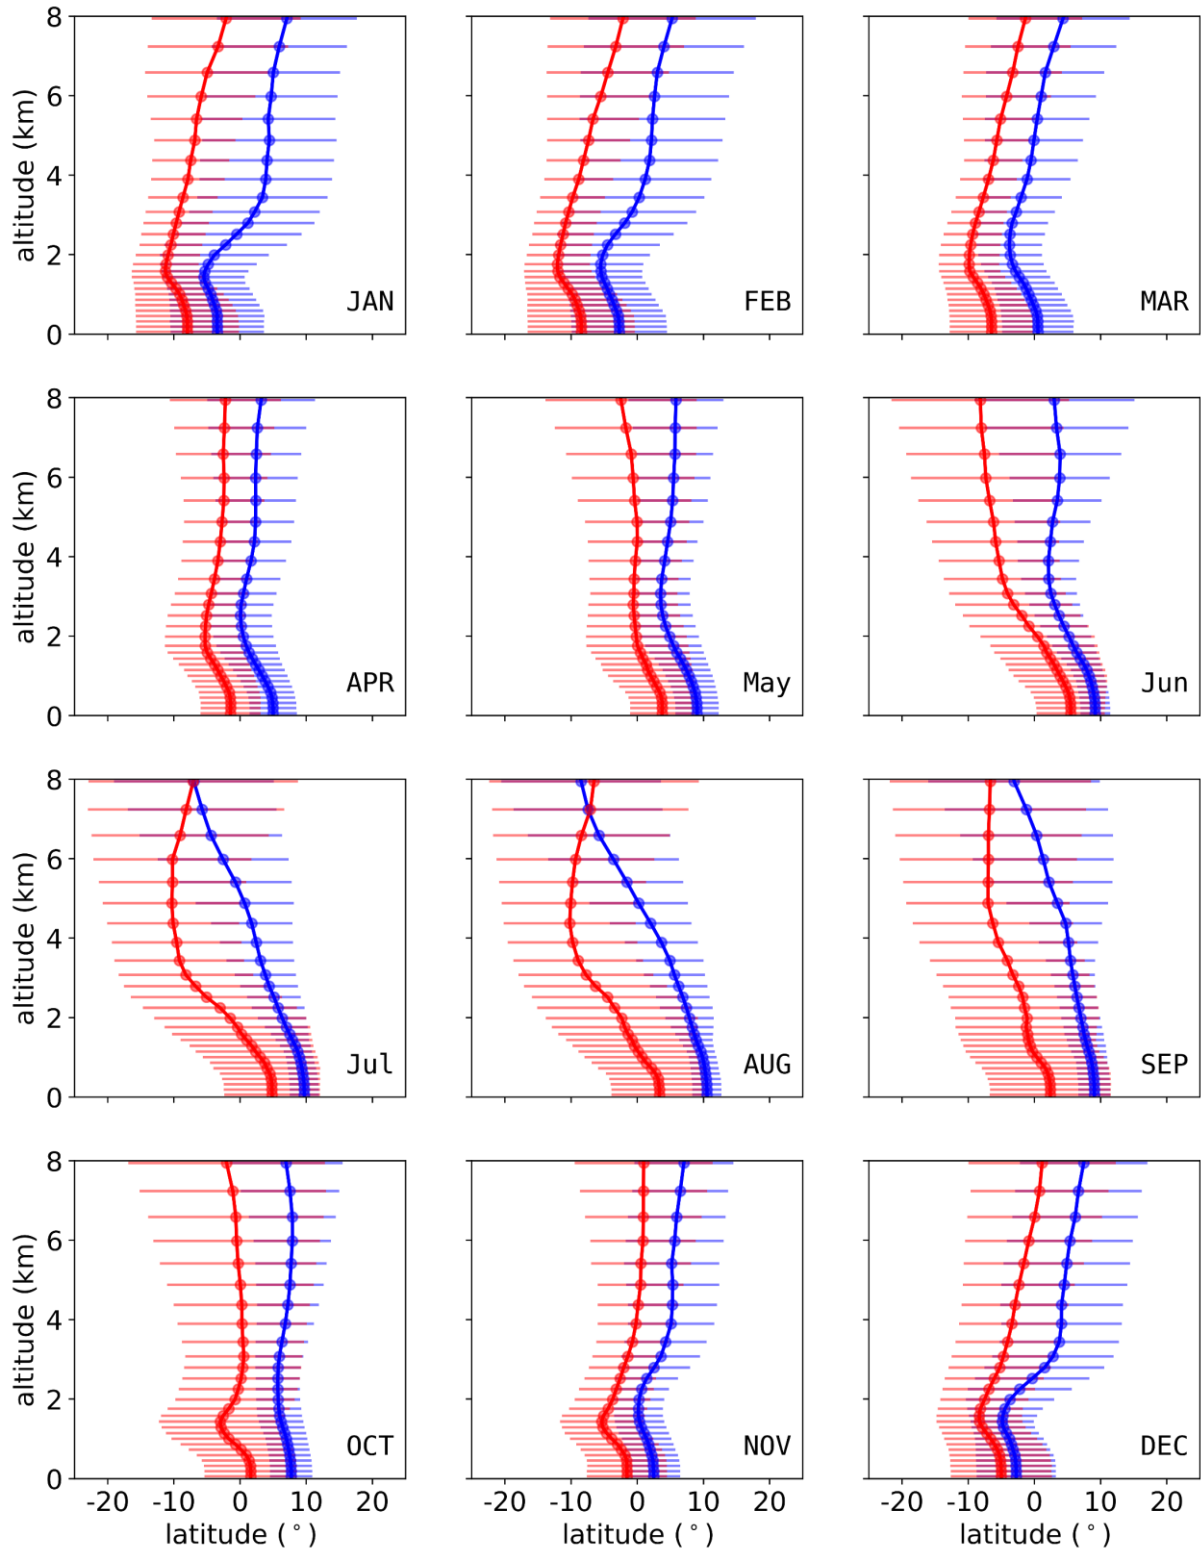

**Supplement Figure 5.** Monthly averaged (2015-2019) CE by altitude. The CE-NH / CE-SH are zonally (15° W - 50° E) averaged over the AF region see Fig. 5. The blue lines show the CE-NH and the red lines show the CE-SH. Only CE-NH / CE-SH below 8 km are shown here because of the large uncertainty in the higher model level. 1- $\sigma$  of the CE-NH and CE-SH are given in the plots.

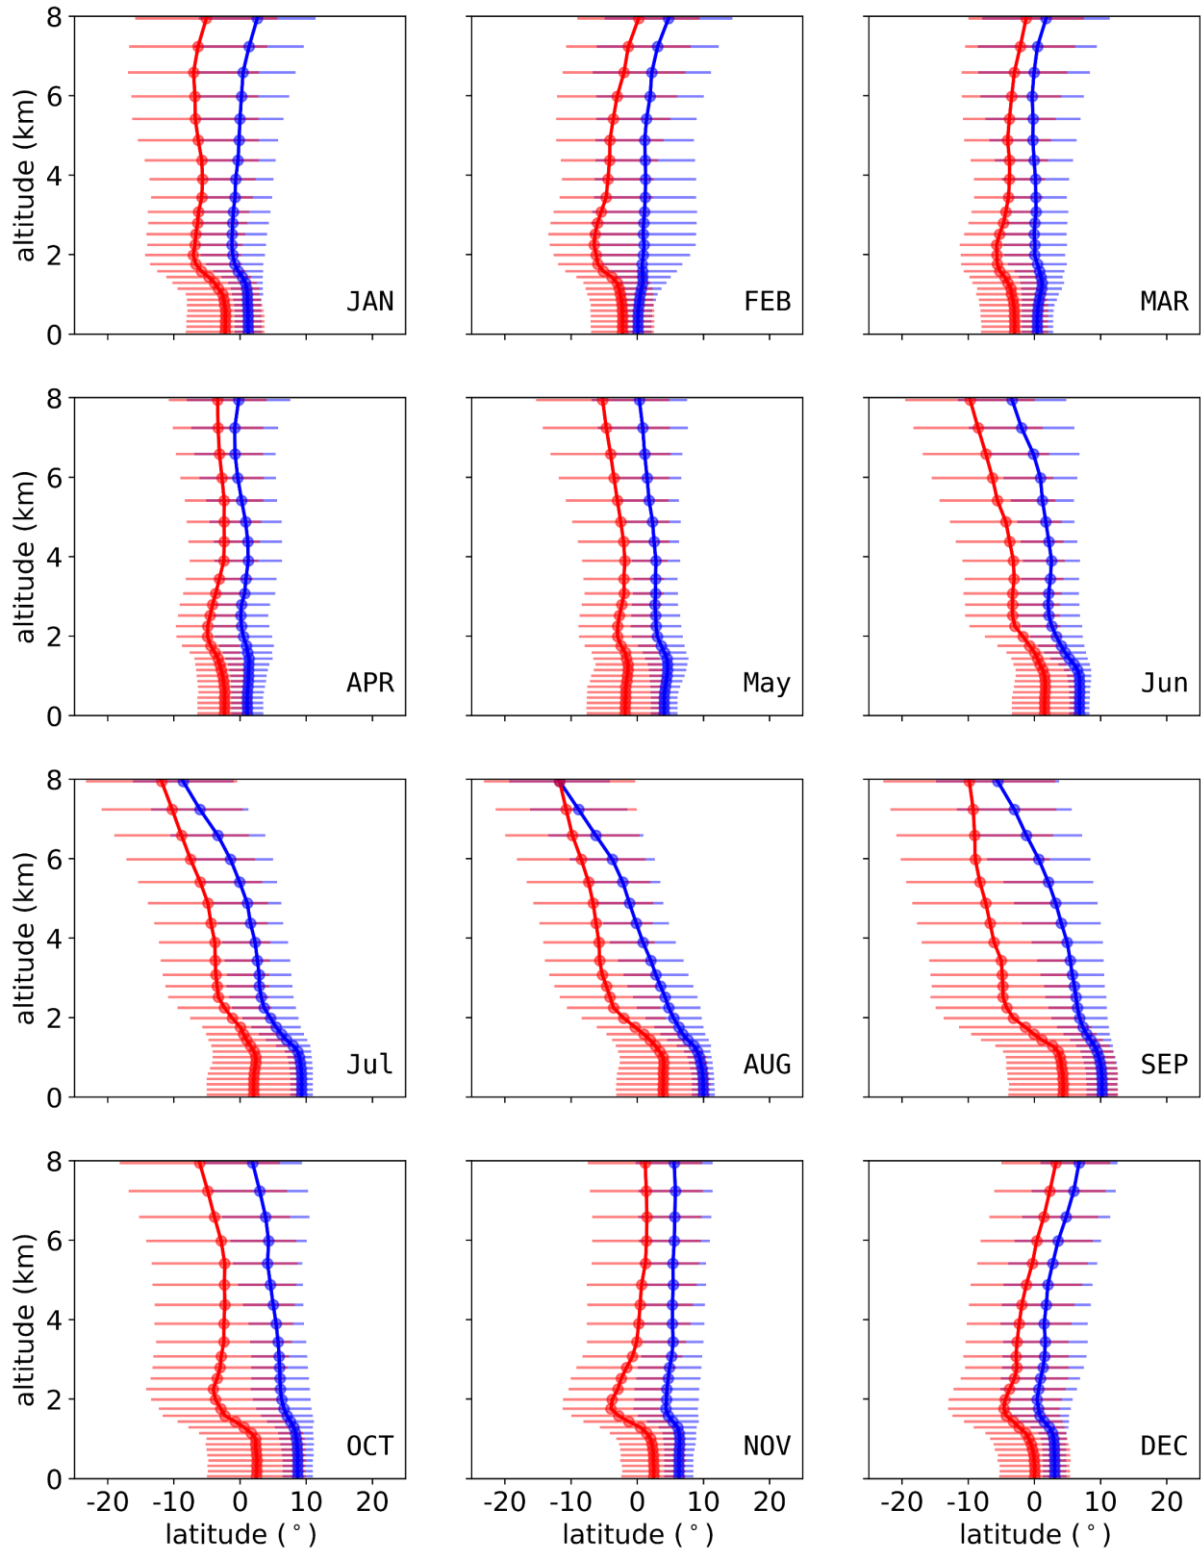

**Supplement Figure 6.** Monthly averaged (2015-2019) CE by altitude. The CE-NH / CE-SH are zonally ( $40^{\circ}$  W -  $15^{\circ}$  W) averaged over the AT region see Fig. 5. The blue lines show the CE-NH and the red lines show the CE-SH. Only CE-NH / CE-SH below 8 km are shown here because of the large uncertainty in the higher model level. 1- $\sigma$  of the CE-NH and CE-SH are given in the plots.

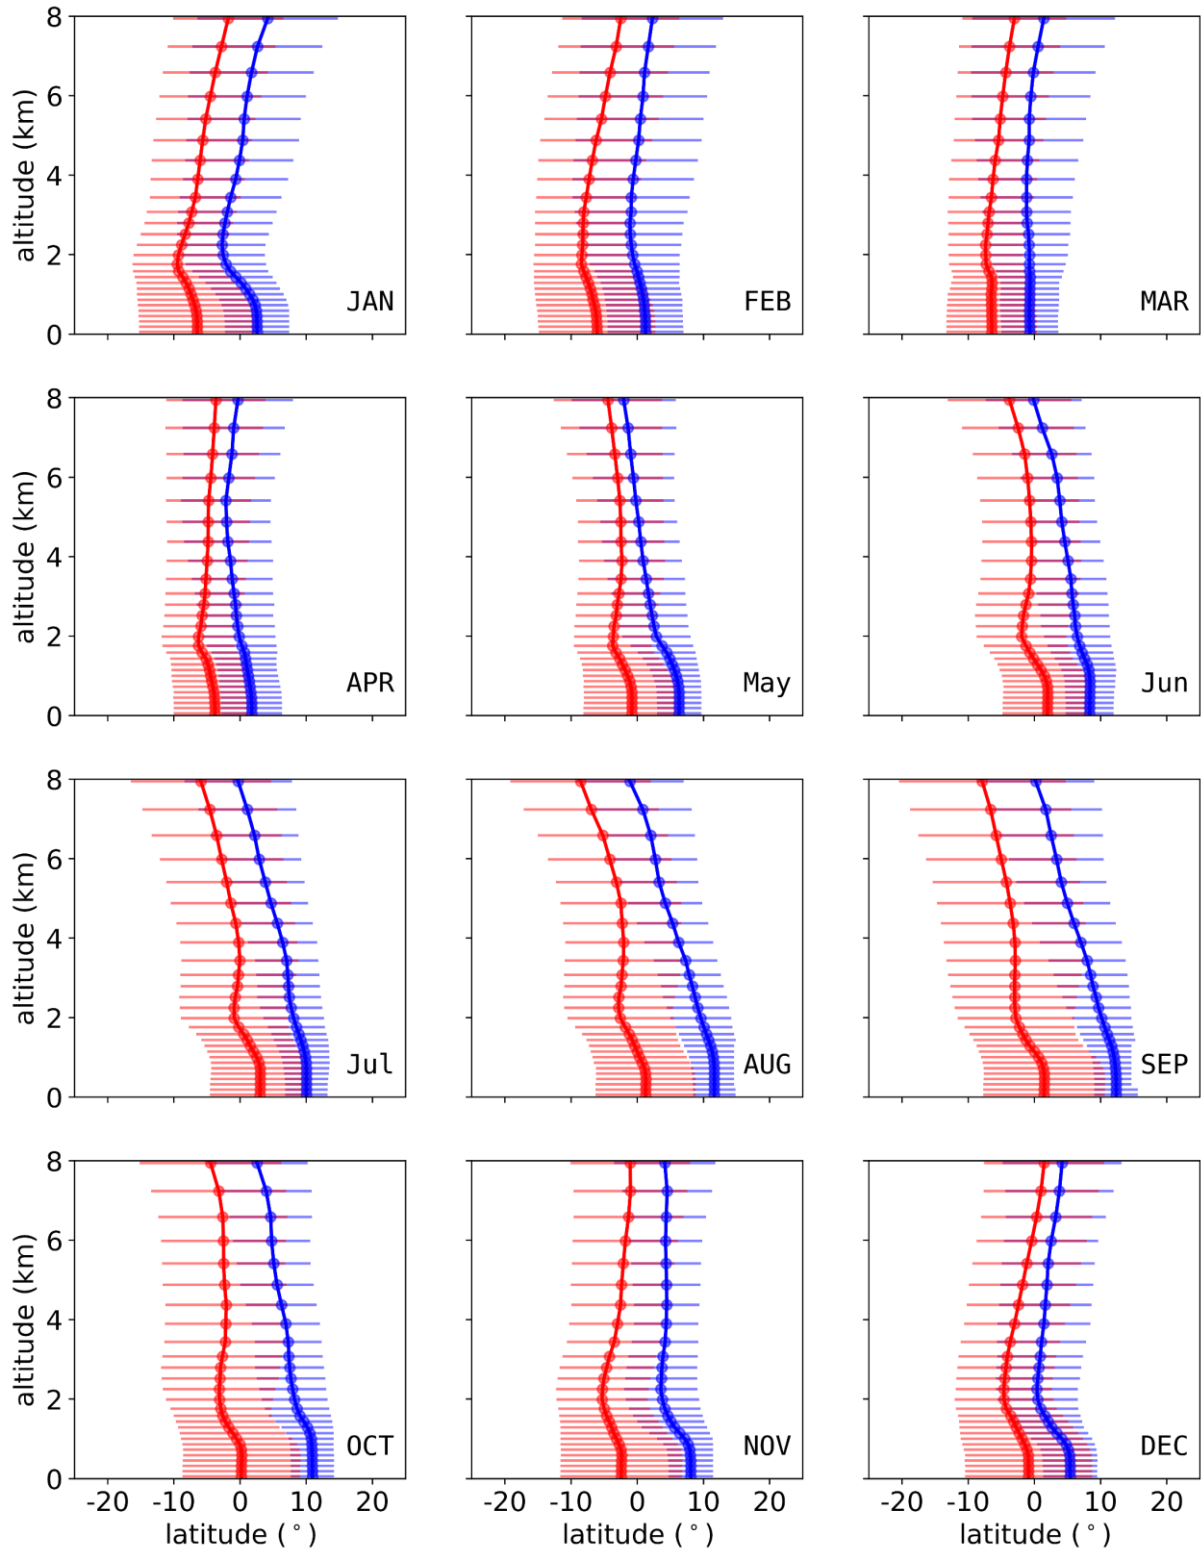

**Supplement Figure 7.** Monthly averaged (2015-2019) CE by altitude. The CE-NH / CE-SH are zonally ( $180^{\circ}$  -  $80^{\circ}$  W) averaged over the CEP region see Fig. 5. The blue lines show the CE-NH and the red lines show the CE-SH. Only CE-NH / CE-SH below 8 km are shown here because of the large uncertainty in the higher model level. 1- $\sigma$  of the CE-NH and CE-SH are given in the plots.

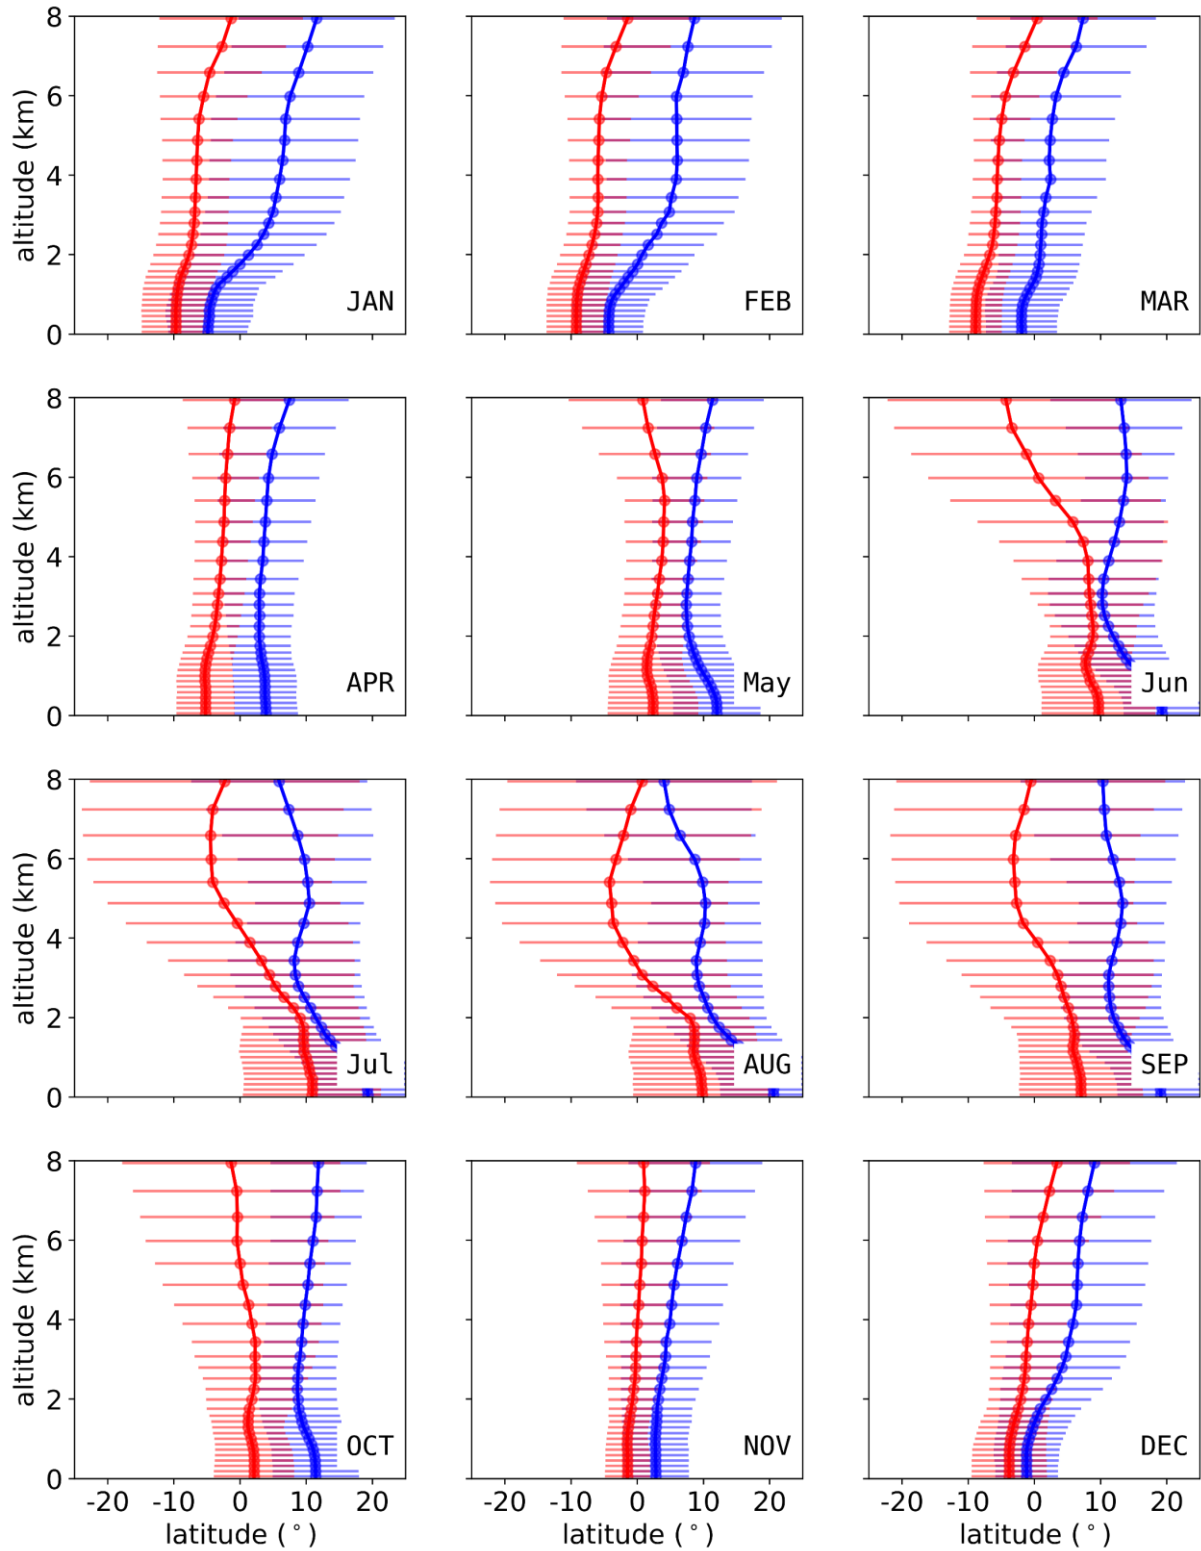

**Supplement Figure 8.** Monthly averaged (2015-2019) CE by altitude. The CE-NH / CE-SH are zonally (50° E – 100° E) averaged over the IO region see Fig. 5. The blue lines show the CE-NH and the red lines show the CE-SH. Only CE-NH / CE-SH below 8 km are shown here because of the large uncertainty in the higher model level. 1- $\sigma$  of the CE-NH and CE-SH are given in the plots.

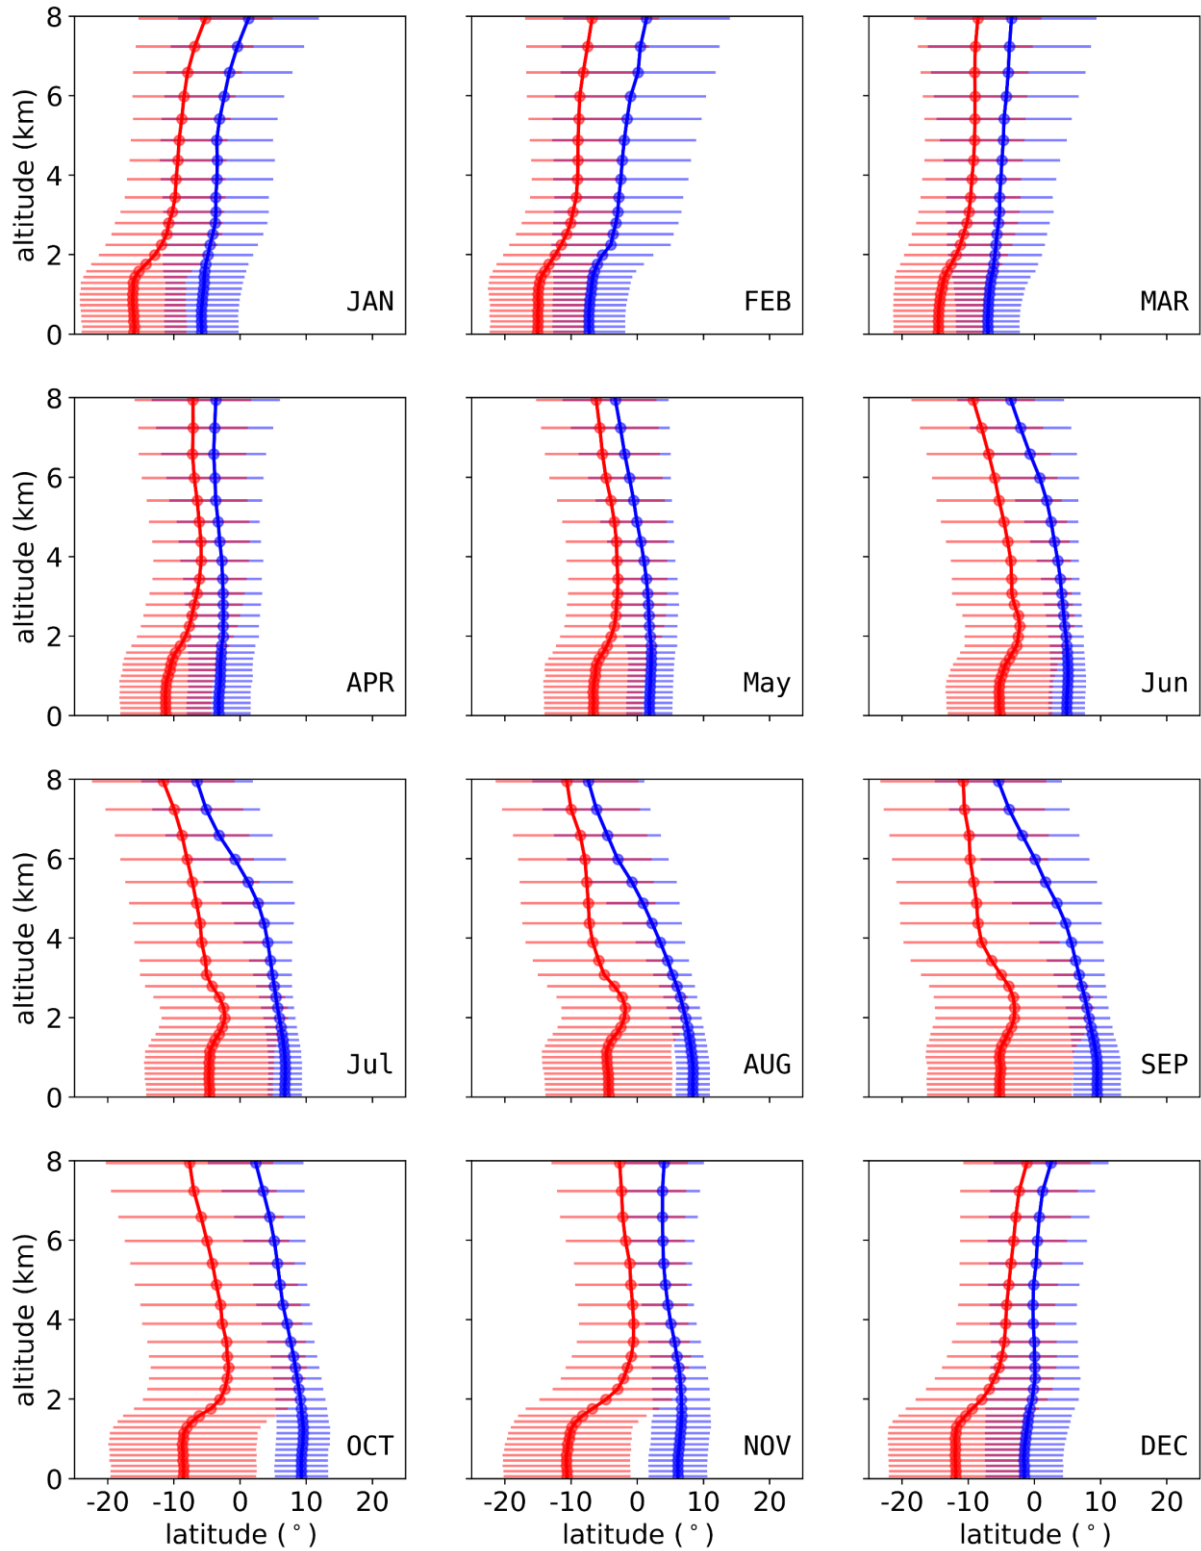

**Supplement Figure 9.** Monthly averaged (2015-2019) CE by altitude. The CE-NH / CE-SH are zonally ( $80^{\circ}$  W -  $40^{\circ}$  W) averaged over the SA region see Fig. 5. The blue lines show the CE-NH and the red lines show the CE-SH. Only CE-NH / CE-SH below 8 km are shown here because of the large uncertainty in the higher model level. 1- $\sigma$  of the CE-NH and CE-SH are given in the plots.
